1 **Quality of life in head and neck cancer survivors: the Big Data for**  
2 **Quality of Life study**

3 **Mauricio Moreira-Soares<sup>1\*</sup>, Erlend I. F. Fossen<sup>1</sup>, Katherine J. Taylor<sup>2</sup>, Susanne Singer<sup>2</sup>,**  
4 **Katrina Hurley<sup>3a</sup>, Steve Thomas<sup>3b</sup>, Miranda Pring<sup>3b</sup>, Andrew Ness<sup>3b</sup>, Stefano Cavalieri<sup>4,5</sup>,**  
5 **Claudia Vener<sup>6</sup>, Laura Lopez-Perez<sup>7</sup>, Maria Fernanda Cabrera-Umpierrez<sup>7</sup>, Giuseppe Fico<sup>7</sup>,**  
6 **Arnoldo Frigessi<sup>1,8</sup>, Lisa Licitra<sup>4,5</sup>, Marissa LeBlanc<sup>1,9</sup>, on behalf of the BD4QoL consortium**

7 <sup>1</sup> Oslo Centre for Biostatistics and Epidemiology, University of Oslo, Oslo, Norway

8 <sup>2</sup> Institute of Medical Biostatistics, Epidemiology, and Informatics, University Medical Centre  
9 Mainz, Germany

10 <sup>3</sup> Bristol Head & Neck 5000 Study, 3a University Hospitals Bristol and Weston NHS Foundation  
11 Trust, Bristol, UK, 3b Bristol Dental School, University of Bristol, United Kingdom

12 <sup>4</sup> Head and Neck Medical Oncology Department, Fondazione IRCCS Istituto Nazionale dei Tumori,  
13 Milan, Italy

14 <sup>5</sup> Department of Oncology and Hemato-oncology, University of Milan, Italy

15 <sup>6</sup> Epidemiology and Prevention Unit, Fondazione IRCCS Istituto Nazionale dei Tumori di Milano,  
16 Milan, Italy

17 <sup>7</sup> Universidad Politécnica de Madrid-Life Supporting Technologies Research Group, ETSIT, Madrid,  
18 Spain

19 <sup>8</sup> Oslo Centre for Biostatistics and Epidemiology, Oslo University Hospital, Oslo, Norway

20 <sup>9</sup> Norwegian Institute of Public Health, Oslo, Norway

21 **\* Correspondence:**

22 Corresponding Author

23 [m.m.soares@medisin.uio.no](mailto:m.m.soares@medisin.uio.no)

24

25

26 **Keywords: quality of life, patient-reported outcomes, survivors, European cohort, reference**  
27 **values**

28

29 **Abstract**

30 **Background:** The Big Data for Quality of Life (BD4QoL) study investigates quality of life (QoL) in  
31 head and neck cancer (HNC) survivors, focusing on survivorship and characterizing survivor  
32 demographics.

33 **Methods:** We screened data from 5 studies across Europe (N=7276) and included patients with a  
34 diagnosis of squamous cell carcinoma (oral cavity, hypopharynx, larynx, oropharynx, nasal cavity  
35 and paranasal sinuses), treated with curative intent, alive after treatment, TNM 7<sup>th</sup> ed. stages I, II, III,  
36 IVa and IVb, with availability of QoL questionnaires.

37 **Results:** The cohort of 4448 HNC survivors primarily includes men (78%) with median age 61 years.  
38 Most received radiotherapy (75%) and had a history of smoking (78%). Survivors' scores on EORTC  
39 QLQ-C30 functioning scales indicated high functioning, with prevalent symptoms of fatigue, pain,  
40 and insomnia. Lower rates of missing data were observed in older patients, those with higher  
41 education and income levels, nonsmokers, married individuals, and patients not treated with  
42 radiotherapy. The odds ratios ranged from 0.47 to 0.99, indicating these factors may predict more  
43 consistent QoL data reporting in HNC survivors.

44 **Conclusions:** These data support the development and validation of clinical prediction models for  
45 QoL in HNC survivors in a multicentre randomized controlled trial.

46

47

## 48 1 Introduction

49 The incidence of head and neck cancer (HNC) has been increasing worldwide in the last years and  
50 reached 1.1 million new diagnoses in 2016<sup>1,2</sup>. Globally, it is the seventh most common type of  
51 cancer<sup>3,4</sup>. At the same time, the overall 5-year survival has improved considerably in the last decades,  
52 changing from 55% in 1992-1996 to 66% in 2002-2006<sup>5</sup>, which makes long-term quality of life  
53 (QoL) a key concern for patients. These changes in survival can be partially explained by better  
54 treatments and a deeper understanding of the disease mechanisms, but also due to an increasing  
55 proportion of human papilloma virus (HPV)-induced oropharyngeal tumours which mainly affect a  
56 younger population with fewer comorbidities and better prognosis<sup>6-10</sup>. According to the stage of the  
57 disease and patient status (i.e., performance status, comorbidities), HNC can be treated with either  
58 single modality or multimodal approaches, including combinations of surgery, radiotherapy, and  
59 systemic therapy<sup>11</sup>. Despite the intention to cure, recurrences in the local and regional areas, as well  
60 as distant relapses, are common<sup>12,13</sup>. Additionally, these treatment methods often lead to significant  
61 toxicities and long-term complications<sup>14-16</sup>. Consequently, the QoL of HNC survivors is frequently  
62 compromised. Health related QoL has been found to be associated with clinical endpoints in  
63 oncology patients<sup>17</sup>, particularly studies have shown strong evidence of association between physical  
64 functioning and global QoL change with overall survival in individuals with HNC<sup>18</sup>. However, there  
65 is limited research on the long-term changes in QoL and the factors that influence these changes.  
66 Existing evidence suggests that global QoL tends to recover within 12 months after HNC treatment,  
67 but late complications persist, including declines in physical functioning, fatigue, xerostomia (dry  
68 mouth), and sticky saliva<sup>19</sup>, affecting overall QoL. Furthermore, the available literature on QoL in  
69 HNC survivors is relatively limited, particularly concerning long-term changes and determinants of  
70 QoL over time<sup>20</sup>. Most studies have focused on short-term recovery, but there is a lack of information  
71 regarding the sustained effects and late sequelae experienced by HNC survivors<sup>21,22</sup>. Investigating  
72 these factors is essential for optimizing patient care, identifying potential interventions to alleviate  
73 specific needs, and improving survivorship outcomes.

74 This study describes the creation of the multi-national Big Data for Quality of Life (BD4QoL)  
75 historical cohort, which was established to investigate QoL in HNC survivors. This cohort will be  
76 used for research to better understand the QoL trajectory in HNC survivors.

77 The aim of the study is to define and describe clinical, demographic, quality of life and behavioural  
78 characteristics of the patients in the BD4QoL historical cohort.

## 79 2 Methods

### 80 2.1 Quality of life questionnaires

81 The EORTC QLQ-C30 is a questionnaire developed by the European Organization for Research and  
82 Treatment of Cancer, for assessing the quality of life of cancer patients<sup>23,24</sup>. This questionnaire is a  
83 Patient Reported Outcome (PRO) instrument which contains 30 questions that compose 10 sub-scales  
84 divided in three groups: functional sub-scales (physical function, role function, cognitive function,  
85 emotional function and social function), symptom sub-scales (pain, fatigue, nausea/vomiting) and  
86 global health status (GHS)/quality of life. In addition, it contains 6 individual items to assess:  
87 dyspnoea, insomnia, appetite loss, constipation, diarrhoea and financial difficulties. All scales and  
88 single-item measures range in score from 0 to 100. A high scale score represents a higher response  
89 level. Thus, a high score for a functional scale represents a high/healthy level of functioning, a high  
90 score for GHS/QoL represents a good overall QoL, but a high score for a symptom scale/item  
91 represents a high level of symptoms/problems.

92 The head and neck cancer module (EORTC QLQ-H&N35) incorporates seven multi-item scales that  
93 assess pain, swallowing, senses (taste and smell), speech, social eating, social contact and sexuality.  
94 There are also eleven single items. For all items and scales, high scores indicate a higher degree of  
95 problems, i.e., there are no functioning scales.

96 The EORTC QLQ-HN43 module is a revised and updated version of the head and neck cancer  
97 module EORTC QLQ-HN35. The 43 items can be combined into the following scales: fear of  
98 progression, body image, dry mouth and sticky saliva, pain in the mouth, sexuality, problems with  
99 senses, problems with shoulder, skin problems, social eating, speech, swallowing, and problems with  
100 teeth. Single item scales are coughing, swelling in the neck, neurological problems, trismus, social  
101 contact, weight loss, and problems with wound healing.

## 102 **2.2 Cohort participants**

### 103 **2.2.1 Datasets**

104 We screened data collected in prior research projects at Istituto Nazionale dei Tumori (Italy),  
105 University Hospitals Bristol and Weston NHS Foundation Trust, and University of Bristol (UK) and  
106 University Medical Centre Mainz (UMM) in Germany to construct this cohort (Table 1). Data  
107 collection was performed with the understanding and written consent of patients enrolled in the  
108 original studies.

109 Head and Neck 5000 (HN5000) is a large UK based study of people with head and neck cancer<sup>25,26</sup>.  
110 The study is sponsored by University Hospitals Bristol and Weston NHS Foundation Trust (UHBW)  
111 and is run by UHBW and the University of Bristol. Briefly, 5511 people were recruited from 76 UK  
112 centres between 2011 and 2014 making it one of the largest prospective cohort studies of people with  
113 head and neck cancer in the world. The study collected more than 200 variables at several timepoints  
114 (from diagnosis to 3 years follow-up), including clinical and demographic characteristics, standard  
115 QoL questionnaires, and information about physical and mental health. The inclusion criteria were<sup>25</sup>:  
116 individuals over the age of 16 with a new head and neck primary cancer seen or discussed at an  
117 appropriate multidisciplinary team (MDT) meeting or clinic; People presenting with a cancer of  
118 unknown primary (CUP); those without a definitive histological diagnosis were eligible if the MDT  
119 decision was that the primary site was likely to be a HNC. The exclusion criteria included: people  
120 considered to meet the criteria for mental incapacity or vulnerability set out in the mental capacity/  
121 vulnerable adult act, recurrent HNC, a second head and neck cancer, skin cancer, lymphoma and a  
122 histological diagnosis of Carcinoma in Situ with no clear evidence of invasion (these patients were  
123 eligible if later upstaged following MDT discussion); Patients who had already commenced their  
124 cancer treatment (with the exception of those whose treatment was also their diagnostic procedure)  
125 were also excluded.

126 The second data set (UMM1)<sup>27</sup> was a prospective cohort study in patients before and after total  
127 laryngectomy (TLE). Further eligibility criteria were written informed consent and age of 18 years or  
128 older. The patients were interviewed in a face-to-face setting before the surgery (t1), shortly before  
129 discharge from the hospital (t2), at the end of rehabilitation (t3), one year after baseline (t4) as well as  
130 two (t5) and three years (t6) after baseline. Participants also completed self-administered  
131 questionnaires, including the EORTC QLQ-C30 and the EORTC QLQ-H&N35. A total of 389  
132 patients were enrolled between the years 2001-2011 from 13 hospitals in Germany.

133 The third data set (UMM2)<sup>28</sup> comes from a similar study, but this time in patients who were  
134 scheduled for partial laryngectomy (PLE). The study design and data collection were in parallel with

135 the UMM1 study up to t4. Data collection began in 2007 and ended in 2015. A sample of 391  
136 patients were enrolled from 16 hospitals in Germany.

137 The fourth data set (UMM3)<sup>29</sup> comes from an international validation study for the update of the  
138 EORTC QLQ-H&N35 questionnaire, the HN43 Phase IV study. In total, 812 patients from 18  
139 countries in Europe, the Americas and Asia were enrolled. Patients with cancer of the larynx (ICD-10  
140 code C32), lip (C00), oral cavity (C01-06), salivary glands (C07-08), oro-hypopharynx (C09-10,  
141 C12-14), nasopharynx (C11), nasal cavity (C30), nasal sinuses (C31), sarcoma in the head and neck  
142 region (C49), and lymph node metastases from Missing primary in the head and neck area (C77,  
143 C80.0).were included. There were no restrictions regarding stage, recurrence status, or treatments  
144 planned or performed. Patients with a tumour of the eyes, orbit, thyroid, skin (even if in the head and  
145 neck area), or lymphomas in the head and neck region were excluded. Patients completed the  
146 questionnaires up to 14 days before start of treatment (t1), three months (t2), and six months  
147 thereafter (t3).

148 The Big Data to Decide (BD2Decide) project was a European multicentre observation study  
149 including 1537 HNC patients from Italy, Germany and the Netherlands<sup>30</sup>. The aim of this project was  
150 to develop a multisource database to allow for prognostic prediction modelling in loco-regionally  
151 advanced HNC patients. The database was made of two cohorts: retrospective (diagnosis 2008-2014),  
152 and prospective (diagnosis 2015-2017). Main inclusion criteria were diagnosis of head and neck  
153 squamous cell carcinoma (HNSCC); stage III and IVA/B (based on AJCC/UICC seventh edition);  
154 receiving treatments with curative intent; availability of pre-treatment tumour specimen for biological  
155 analysis; availability of pre-treatment imaging scans for radiomic analysis; for patients enrolled  
156 prospectively, PROs were collected (EORTC C30, EORTC HN35 and EQ-5D-5L). The BD4QoL  
157 study included the prospective BD2Decide patients enrolled at one of the Italian cancer centres.

158 These longitudinal studies enrolled patients at diagnosis and before treatment initiation.

159 In the BD4QoL study, survivors are defined by the following inclusion and exclusion criteria:

160 **Inclusion criteria**

- 161 1. Non-metastatic head and neck cancers from one of the following subsites (ICD in annex 1):  
162 oral cavity, hypopharynx, larynx, oropharynx, nasopharynx, major or minor salivary glands,  
163 nasal cavity, paranasal sinuses.
- 164 2. Having received and concluded treatments with curative intent at time of study inclusion.
- 165 3. Being alive and disease-free at last post-treatment follow-up.
- 166 4. Stage I, II, III, IVa or IVb according to TNM 7<sup>th</sup> edition<sup>31</sup>.
- 167 5. Age  $\geq$ 18 years.

168 **Exclusion criteria**

- 169 1. Histologies other than squamous cell carcinoma and salivary gland carcinomas (e.g., sarcoma,  
170 melanoma are excluded). Thyroid cancers, neuroendocrine tumours and non-epithelial HNC  
171 (e.g., melanoma, sarcoma, etc.) are excluded.
- 172 2. Distant metastases at the time of study entry.

173 3. Any previous HNC unrelated to the primary HNC for which the participant was treated;  
174 premalignant lesions (e.g., leukoplakia, erythroplakia, lichen etc.) are allowed.

175 4. Subjects with previous malignancies (except localized non-melanoma skin cancers, and the  
176 following in situ cancers: bladder, gastric, colon, esophageal endometrial, cervical/dysplasia,  
177 melanoma, or breast) unless a complete remission was achieved at least 5 years prior to study  
178 entry and no additional therapy is required during the study period.

179

### 180 **2.2.2 Baseline definition**

181 HNC survivors were defined as those patients alive and disease free after the end of treatment.  
182 However, end of treatment was not recorded in HN5000 and BD2Decide studies, and the QoL  
183 measurements were not exactly aligned with end of treatment (Table 2). Therefore, we defined the  
184 BD4QoL “baseline” as the first available QoL measurement after the known or inferred end of  
185 treatment. The baseline for UMM1 and UMM2 studies is defined as 4 months after diagnosis and for  
186 UMM3 is at 3 months, when end of treatment is recorded. For BD2Decide, the baseline is defined at  
187 6 months after diagnosis, when all patients are assumed to have finished treatment in this study. In  
188 the case of HN5000, the baseline is established at 12 months after diagnosis, when all patients have  
189 finished their curative treatment.

### 190 **2.3 Data harmonization**

191 We performed data harmonization in a subset of variables to achieve compatible and comparable  
192 measurements across the different studies following the BD4QoL ontology<sup>32</sup>. In total, we harmonized  
193 29 variables, consisting of 14 demographic and clinical variables and 15 QoL domains (



194 Table 3). In addition, survival time and status were recorded in HN5000, BD2Decide and UMM1  
195 studies, while UMM2 and UMM3 presented interval censored data.

196 Beyond the harmonised data, the studies that contributed data to this project recorded between  
197 hundreds to more than 2000 variables, which are therefore available in subsets of the BD4QoL  
198 cohort. Two versions of the head and neck module of the EORTC questionnaire were used in the  
199 studies, in addition to demographics and several other questionnaires which attempt to capture fear of  
200 recurrence, personal costs, hospital anxiety and depression, and general health.

## 201 **2.4 Statistical analysis**

202 Survival curves, stratified by study, were estimated using the Kaplan-Meier estimator. Survival  
203 curves were only made for the BD2Decide, HN5000 and UMM1 studies, as other studies presented  
204 interval censored data with few measurements.

205 To show the trajectory of overall quality of life over time, conditional on survival, we estimated the  
206 mean GHS/QoL for each time point with a QoL measurement in each study. A 95% confidence  
207 interval for the means were obtain by bootstrap with 1000 bootstrap resamples per time point.

208 To explore the factors associated with missing quality of life (QoL) measurements, univariate logistic  
209 regression analyses were performed. The response variable was a binary indicator for whether the  
210 GHS/QoL scale was missing or not. This scale was chosen because it summarises global QoL. The  
211 covariates considered in the respective univariate models were age, sex, tumour stage, tumour  
212 location, treatment, income, education, smoking status, and alcohol consumption.

213 For interpretation of the EORTC QLQ-C30 scales we used the thresholds for clinical importance  
214 (TCIs) proposed by Giesinger et al., which allow to identify patients with clinically important  
215 problems or symptoms<sup>33</sup>.

## 216 **3 Results**

### 217 **3.1 Cohort characteristics**

218 In total, 4448 HNC survivors were eligible for inclusion in this study (Figure 1). INT contributed 112  
219 subjects with QoL measurements under BD2Decide semantics<sup>30,34,35</sup>. UMM contributed 883 subjects  
220 across 3 different longitudinal cohort studies (UMM1, UMM2, and UMM3), and Bristol contributed  
221 3587 subjects using Head and Neck 5000 semantics and documentation available online  
222 ([headandneck5000.org.uk](http://headandneck5000.org.uk)). All datasets contain quality of life scores based on the EORTC QLQ-C30  
223 and EORTC QLQ-H&N35 or EORTC QLQ-HN43 questionnaires.

224 The patients in the cohort were predominately male (78%), had a median age of 61 years, had  
225 primarily low (47%) to medium education level (35%), most were married or lived with a partner  
226 (68%), had a history of smoking (78%) and high alcohol consumption (median 84 alcohol  
227 units<sup>1</sup>/month) (

---

<sup>1</sup> Alcohol unit is a dimensionless measurement unit defined as 10ml or 8g of pure alcohol.

228 Table 3). The education level variable presented distinct definitions across studies due to different  
229 educational systems. Thus, the education levels were mapped to years of education and converted  
230 into three categories: low (<10 years), medium (from 10 to 12 years), and high (>12 years). Overall,  
231 75% of patients underwent radiotherapy, while 41% were treated with surgery and 38.6% received  
232 chemotherapy. Nearly half of the patients (48%) were treated with at least two therapeutic modalities,  
233 with the combination of chemotherapy and radiation being the most prevalent at 29%. The pairing of  
234 radiotherapy and surgery was the next most common, involving 10% of patients, and a combination  
235 of all three treatment approaches was used in 8% of cases. There was considerable heterogeneity  
236 between the datasets in some characteristics, particularly tumour stage and tumour region, where  
237 some studies had enrolled patients with only specific regions or tumour stages. For instance, in the  
238 BD2Decide dataset, only loco-regionally advanced stage tumours were represented (stages III and  
239 non-metastatic IV in TNM 7<sup>th</sup>). The UMM1 dataset predominantly consisted of advanced stage cases  
240 as well with 79.2% of stage III and IV subjects, while the remaining datasets demonstrated a more  
241 balanced distribution across tumour stages. In terms of tumour region, the UMM3 and HN5000  
242 datasets had a limited number of cases involving the nasopharynx, salivary glands, nasal cavity, and  
243 paranasal sinuses. In addition, the UMM1 and UMM2 datasets contained cases with tumours  
244 overlapping multiple areas. In the integrated data, the three biggest tumour site groups were  
245 oropharynx (37.1%), larynx (31.3%) and oral cavity (23.6%). Tumour stages I, II, III and IV were  
246 distributed as 24.4%, 17.9%, 13.8% and 42.0% respectively.

247 Survivors had an average probability of overall survival for one year after end of treatment of 0.94  
248 [95% CI: 0.93, 0.95] and of 0.88 [0.87, 0.89] after 2 years. For BD2Decide, the 1- and 2-years  
249 overall survival were 0.95 [0.91, 0.99] and 0.86 [0.79, 0.94] respectively, for UMM1 0.88 [0.83,  
250 0.93] and 0.76 [0.70, 0.83], and for HN5000 0.94 [0.93, 0.95] and 0.89 [0.88, 0.90] (see Figure 2).

251 Concerning the GHS/QoL of survivors, we observed that survivors presented some level of QoL  
252 impairment at diagnosis and their QoL tends to decrease further during or immediately after  
253 treatment (3 and 4 months) (Figure 3). After reaching the minimum QoL, survivors recovered to a  
254 higher level (see the mean QoL at 6 and 12 months and later time points). However, according to  
255 recently established TCIs<sup>33</sup> for the EORTC QLQ-C30 functioning and symptom scales, 40% and  
256 35% of patients presented scores within ranges that indicate clinically important troubles related to  
257 physical and cognitive functioning respectively, 36 months post-diagnosis. Additionally, 30%  
258 reported fatigue and 39% indicated experiencing pain over the respective TCIs (see Table 4). Table 5  
259 displays the data for the head and neck module, showing that the highest median scores among the  
260 EORTC QLQ-H&N35 scales were for dry mouth, coughing, sticky saliva, and reduced sexuality,  
261 with all four symptoms sharing a median value of 33.

### 262 3.2 Missing data

263 The proportion of missing values depended on the type of variable. Most clinical variables (e.g., sex,  
264 age, tumour stage and location and treatment) presented low missingness of 0-6.4%. Variables  
265 collected through interviews (e.g., marital status, education level and tobacco usage) had moderate  
266 missingness of 25.9-39.3%, while QoL variables had higher missingness, 39.9-41.8% at baseline.  
267 The majority of missing data in QoL variables was related with missing of the whole questionnaire  
268 (N=1692), usually because patients did not send them back, whereas 8.8% of subjects (N=393)  
269 presented missing values only in specific QoL subscales while others were measured (See Table 6  
270 and figure S1 in the Supplementary Information). It is important to notice that the high proportion of  
271 unfilled questionnaires is driven by patients receiving the questionnaires by post and never returning  
272 them, while most patients that returned the questionnaire answered all questions. Finally, some data



273 was missing in blocks in the dataset because studies did not collect the exact same variables. Body  
274 mass index (BMI) information was solely available for HN5000, and BD2Decide lacked data on  
275 education level and income. Furthermore, the UMM3 dataset did not include information on alcohol  
276 consumption and smoking status.

277 There were several associations between the frequency of missing QoL measurements and certain  
278 patient features (p-value < .05, Table 6). Specifically, being a female (OR: 0.88), older age (OR:  
279 0.99), possessing a high level of education (OR: 0.48), having a high income (OR: 0.51), never being  
280 a smoker (OR: 0.48), being married or living with a partner (OR: 0.74), and treatment without  
281 radiotherapy (OR: 0.80) were found to be associated with a lower frequency of missing QoL data  
282 (see Table 6 for the full list of odds ratios).

## 283 4 Discussion

284 In this study, we defined and built a cohort of HNC survivors from historical data contributed from  
285 studies conducted in Germany, Italy, and the UK, with clear eligibility criteria and survivorship  
286 definition. To the best of our knowledge this is the largest cohort of HNC survivors in the world.

287 We observed large interstudy heterogeneity in global health status GHS/QoL at the survivorship  
288 baseline, i.e., at the first QoL measurement after end of treatment. Two important factors that can  
289 impact GHS/QoL should be considered: the time at which the baseline GHS/QoL was measured and  
290 the amount of missingness. Usually, QoL immediately after treatment is lower than at later  
291 timepoints<sup>36</sup>, which can explain the lower GHS/QoL in some contributing studies compared to  
292 others. For example, the UMM studies measured QoL just after treatment completion (3-4 months  
293 after diagnosis), while the HN5000 measured QoL 12 months after diagnosis, which may be several  
294 months after actual end of treatment for some patients. BD2Decide measured QoL 6 months after  
295 diagnosis, but the proportion of missing values is 50.9%. Since the missingness is related to the  
296 measurement, e.g., patients with the lowest GHS/QoL might not answer the questionnaire, the bias  
297 introduced can lead to a higher QoL on average than expected.

298 Overall survival 1-2 years after treatment remained high on average, but there were differences  
299 between the studies with UMM1 having shorter survival than BD2Decide and HN5000. This may be  
300 related to the patient characteristics in the studies but may also be partly explained by how end-of-  
301 treatment (baseline) was defined in the studies. In UMM1 the baseline was at 4 months after  
302 diagnosis, while the baseline was later in BD2Decide (at 6 months after diagnosis) and in HN5000  
303 (12 months after diagnosis).

304 Regarding the QoL trajectory over time, we observe a dip in GHS/QoL around treatment, followed  
305 by an increase after treatment and a flattening out over time. This pattern has also been observed in  
306 previous studies<sup>37-39</sup>. Based on the EORTC QLQ-H&N35 scales, the most prominent concerns for  
307 this cohort are related to physical symptoms such as dry mouth, sticky saliva, and coughing.

308 We identified being female, older age, high education level, high income, and not smoking as factors  
309 associated with lower probability of not completing the GHS/QoL scale. This highlights the  
310 importance of proper missing data handling for improving the interpretability and analysis of QoL  
311 data in this population, as complete case approaches can introduce selection bias and impact the  
312 validity of the results. Furthermore, it is important to acknowledge the presence of data missing in  
313 blocks in the dataset, defined as structured missingness (SM)<sup>40</sup>. SM can be caused by several reasons,  
314 but it arises naturally when integrating multisource data due to studies collecting different sets of  
315 variables to address different research questions. This is a missing pattern that is becoming more

316 common due to the increase in use of multisource data integration for machine learning models  
317 development. In the BD4QoL data SM is also present due to patients who never received the  
318 questionnaires or never returned them by post.

319 The BD4QoL historical cohort has several important strengths. It is to date the largest dataset on  
320 HNC survivors with 4448 subjects. The BD4QoL study is composed mainly by HNC survivors from  
321 3 countries in Europe (Italy, Germany, and UK), in addition to smaller groups from many countries  
322 in different continents (Americas, Asia and Europe) included in the UMM3 study. This provides a  
323 dataset with rich demographics and regional variations. The data contains repeated QoL  
324 measurements acquired at various timepoints giving opportunity to unveil the longitudinal course of  
325 QoL in HNC survivors. The standardized and validated EORTC QLQ-C30 and the head and neck  
326 modules H&N35/43 were applied in all studies integrated in the BD4QoL cohort, which provides  
327 rich information about multidomain QoL. This can be used to describe HNC survivors, identify their  
328 needs to improve patient care and long-term QoL. The data providers maintained high quality data  
329 standards in the original studies, which consequently make the integrated BD4QoL data of excellent  
330 quality as well.

331 Nonetheless, it is important to state weaknesses in this study that can limit the scope of potential  
332 future analyses. Most of the survivors in the BD4QoL historical cohort are white Europeans, with the  
333 Global South and other ethnicities being underrepresented – though this represents the population  
334 where the studies were conducted. The number of questionnaires that were not returned by the  
335 patients and the patterns of missing data identified have the potential to introduce biases in future  
336 analyses, so missing data handling strategies should be carefully considered. In addition, structured  
337 missingness is present which requires specialized methods if the affected variables are kept in the  
338 analyses<sup>41,42</sup>. The heterogeneity in the time of which patients are considered survivors – whether after  
339 3, 4, 6, or 12 months – is also a challenging aspect in this data. All patients are survivors, but those  
340 who have survived for longer, like 12 months, may not only have different QoL but also a greater  
341 likelihood of surviving even longer.

## 342 **5 Findings to date**

343 Time is often a neglected variable in clinical studies, but it has a clear impact in PROs<sup>43</sup>. Instruments  
344 measuring PROs are administered at various timepoints across studies due to the different research  
345 questions and assumed intervention effects. Quality of life measurements are sensitive to time of  
346 collection and impose a challenge for interoperability when different datasets are to be integrated.

347 However, measuring QoL “as often as possible”, which is sometimes done, is also not a solution for  
348 this problem because study participants then lose the motivation to complete the forms properly and  
349 completely. As a rule of thumb, about 4 times a year in the first year after diagnosis and once a year  
350 after that are usually acceptable by patients.

## 351 **6 Ethics statement**

352 Our study was conducted in full accordance with ethical principles, including the World Medical  
353 Association's Declaration of Helsinki (2002 version). The study protocol received ethical approval by  
354 the Norwegian Regional Committee for Medical and Health Research Ethics (REK) South-East D  
355 under application number 154191. The data is stored in compliance with GDPR legislation in the  
356 secure server for sensitive data at the University of Oslo (TSD/USIT) and access is granted to  
357 authorised collaborators included in the ethical approval. Each individual study that provided data

358 received ethical approval from local authorities in Italy, Germany, the UK, and all further countries  
359 involved. The data providers submitted copies of these ethical approvals to the principal investigator.

360 BD2Decide study was approved by institutional research ethics board with identifier N. INT 65/16.

361 The HN5000 study was approved by the National Research Ethics Committee (South West Frenchay  
362 Ethics Committee, reference number 10/H0107/57, 5 November 2010) and the Research and  
363 Development departments of participating NHS Trusts. Informed consent was obtained from all  
364 patients recruited to HN5000.

365 UMM1 and UMM2 received ethical approval from the Leipzig University Ethics Committee. UMM3  
366 was approved by Landesärztekammer Rheinland-Pfalz ethics committee under approval number  
367 837.281.14 (9520).

## 368 **7 Conflict of Interest**

369 Marissa LeBlanc reports receiving a speaker fee from MSD unrelated to the content of this work.  
370 Susanne Singer reports receiving honoraria for reviewing journal papers for the Quality-of-life-prize  
371 of Lilly, outside of this work. Lisa Licitra declares research funds to the institute for clinical studies  
372 from Astrazeneca, BMS, Boehringer Ingelheim, Celgene International, Eisai, Exelixis, Debiopharm  
373 International SA, Hoffmann-La Roche Ltd, IRX Therapeutics, Medpace, Merck-Serono, MSD,  
374 Novartis, Pfizer, Roche, Buran, Alentis; occasional fees for participation as a speaker at  
375 conferences/congresses or as a scientific consultant for advisory boards from Astrazeneca, Bayer,  
376 MSD, Merck-Serono, AccMed, Neutron Therapeutics, Inc.

377 The remaining authors declare that the research was conducted in the absence of any commercial or  
378 financial relationships that could be construed as a potential conflict of interest.

379

## 380 **8 Author Contributions**

381 MMS, KT, SS, KH, ST, AN, CV, LL-P, MFC-U, GF, LL, ML contributed to the conceptualization of  
382 the study. SS, KH, ST, AN, MFC-U, AF, LL, ML were responsible for funding acquisition. KT, SS,  
383 KH, ST, MP, AN, SC, LL conducted data sharing. MMS, EIFF, AF, ML participated in the  
384 investigation process. MMS, EIFF developed and/or worked with the necessary software. MMS,  
385 EIFF, KT, CV, ML crafted the methodology framework of the study. LL-P, AF, LL provided the  
386 resources needed for the research. All authors contributed to writing the manuscript.

## 387 **9 Funding**

388 The BD4QoL project, in the frame of which this work is being conducted, has received funding from  
389 the European Union's Horizon 2020 research and innovation program under grant agreement No  
390 875192. MM-S received funding from the European Union's Horizon 2020 Research and Innovation  
391 program under the Marie Skłodowska-Curie Actions Grant, agreement No. 80113 (Scientia  
392 fellowship). This Publication presents data from the Head and Neck 5000 study. The study was a  
393 component of independent research funded by the National Institute for Health and Care Research  
394 (NIHR) under its programme Grants for applied Research scheme (RP-PG-070-10034). The views  
395 expressed in this publication are those of the author(s) and are not necessarily those of the NHS, the  
396 NIHR or the department of health and Social Care. Core funding was also provided through awards

397 from Above and Beyond, University Hospitals Bristol and Weston Research Capability Funding and  
398 the NIHR Senior Investigator award to Professor Andy Ness. The UMM1 study was funded by the  
399 German Federal Ministry of Education and Science (Grant Number: 7DZAIQTX), the UMM1 and  
400 UMM2 study by the German Cancer Aid (Grant Numbers #106654, #107440, #108758, #109604),  
401 the UMM3 study by the European Organisation for Research and Treatment of Cancer (Grant  
402 Number: 001/2014).

## 403 **10 Acknowledgments**

404 This work was performed on the TSD (Tjeneste for Sensitive Data) facilities, owned by the  
405 University of Oslo, operated and developed by the TSD service group at the University of Oslo, IT-  
406 Department (USIT). The statistical analysis and data harmonisation were performed on resources  
407 provided by Sigma2 - the National Infrastructure for High Performance Computing and Data Storage  
408 in Norway. The Authors thank the researchers and clinicians who designed the BD2Decide, HN5000,  
409 and Mainz studies, the research, laboratory and clinical staff who supported the conduct of the  
410 studies; and the people with head and neck cancer who took part.

## 411 **11 Data Availability Statement**

412 The BD4QoL historical cohort dataset is hosted by the Services for Sensitive Data (TSD) at the  
413 University of Oslo. Access to the data may be granted by the data owners upon application.

414 The data that support the findings of this study are available from head and neck 5000. Further  
415 information may be found on the Head and Neck 5000 website: [https://www.headand](https://www.headandneck5000.org.uk/information-for-researchers)  
416 [neck5000.org.uk/information-for-researchers](https://www.headandneck5000.org.uk/information-for-researchers).

417

## Tables

418 **Table 1 - Historical datasets included in BD4QoL. Study ID is the ID used in this manuscript;**  
419 **study short name is the original short study name. Shown are the number of cases before**  
420 **eligibility filtering (N), the number of eligible cases according to the eligibility criteria in this**  
421 **study (Eligible). Eligible number of cases could not be assessed for BD2Decide because a**  
422 **selection was made prior to data transfer.**

| Study ID      | Study short name | References       | Region    | N           | Eligible    |
|---------------|------------------|------------------|-----------|-------------|-------------|
| <b>HN5000</b> | HN5000           | <sup>25,26</sup> | UK        | 5404        | 3572        |
| <b>UMM1</b>   | TLE              | <sup>27</sup>    | DE        | 473         | 180         |
| <b>UMM2</b>   | PLE              | <sup>28</sup>    | DE        | 468         | 426         |
| <b>UMM3</b>   | HN43 Phase IV    | <sup>29</sup>    | DE        | 812         | 158         |
| <b>INT</b>    | BD2Decide        | <sup>30</sup>    | IT        | 119         | 112*        |
| <b>Total</b>  | <b>BD4QoL</b>    |                  | <b>EU</b> | <b>7276</b> | <b>4448</b> |

423 \*The data was filtered for QoL availability before data transfer (INT)

424

425

426 **Table 2 – Planned data collection per study. All studies collected data at diagnosis/before**  
427 **treatment (0 months), but end of treatment varies across study. UMM studies recorded end of**  
428 **treatment, either with start of patient rehabilitation or hospital discharge at approximately 4**  
429 **months. In BD2Decide and HN5000 study all patients are assumed to have concluded treatment**  
430 **before 6 and 12 months respectively.**

| study/time (months) | 0 | 3          | 4          | 6          | 12         | 18 | 24 | 36 |
|---------------------|---|------------|------------|------------|------------|----|----|----|
| BD2Decide           | x |            |            | <b>EoT</b> |            | x  | x  |    |
| UMM1                | x |            | <b>EoT</b> | x          | x          |    | x  | x  |
| UMM2                | x |            | <b>EoT</b> | x          | x          |    |    |    |
| UMM3                | x | <b>EoT</b> |            | x          |            |    |    |    |
| HN5000              | x |            | x          |            | <b>EoT</b> |    |    | x  |

431 EoT – End of treatment

432

433



434 **Table 3 – Baseline cohort characteristics for the BD4QoL historical cohort stratified by study.**

| Characteristic                    | INT<br>N = 112 <sup>1</sup> | UMM1<br>N = 180 <sup>1</sup> | UMM2<br>N = 426 <sup>1</sup> | UMM3<br>N = 158 <sup>1</sup> | UOB<br>N = 3572 <sup>1</sup> | Overall<br>N = 4448 <sup>1</sup> |
|-----------------------------------|-----------------------------|------------------------------|------------------------------|------------------------------|------------------------------|----------------------------------|
| Sex, n (%)                        |                             |                              |                              |                              |                              |                                  |
| 1 - Male                          | 85 (76)                     | 163 (91)                     | 390 (92)                     | 118 (75)                     | 2,694 (75)                   | 3,450 (78)                       |
| 2 - Female                        | 27 (24)                     | 17 (9.4)                     | 36 (8.5)                     | 40 (25)                      | 878 (25)                     | 998 (22)                         |
| Age at diagnosis                  |                             |                              |                              |                              |                              |                                  |
|                                   | 59 (53, 67)                 | 55 (50, 64)                  | 63 (54, 71)                  | 66 (57, 73)                  | 61 (54, 68)                  | 61 (54, 68)                      |
| Missing                           | 0                           | 26                           | 108                          | 0                            | 0                            | 134                              |
| Education level, n (%)            |                             |                              |                              |                              |                              |                                  |
| 1 - Low                           | 0 (NA)                      | 75 (52)                      | 147 (45)                     | 54 (37)                      | 1,197 (47)                   | 1,473 (47)                       |
| 2 - Medium                        | 0 (NA)                      | 50 (35)                      | 133 (41)                     | 25 (17)                      | 886 (35)                     | 1,094 (35)                       |
| 3 - High                          | 0 (NA)                      | 19 (13)                      | 47 (14)                      | 66 (46)                      | 450 (18)                     | 582 (18)                         |
| Missing                           | 112                         | 36                           | 99                           | 13                           | 1,039                        | 1,299                            |
| Household income (€/month), n (%) |                             |                              |                              |                              |                              |                                  |
| 1 - Less than 500                 | 0 (NA)                      | 19 (17)                      | 8 (2.9)                      | 0 (NA)                       | 367 (16)                     | 394 (15)                         |
| 2 - 500 - 1500                    | 0 (NA)                      | 50 (43)                      | 97 (36)                      | 0 (NA)                       | 696 (30)                     | 843 (31)                         |
| 3 - 1501 - 2500                   | 0 (NA)                      | 36 (31)                      | 113 (42)                     | 0 (NA)                       | 480 (21)                     | 629 (23)                         |
| 4 - 2501 - 3500                   | 0 (NA)                      | 7 (6.1)                      | 42 (15)                      | 0 (NA)                       | 188 (8.1)                    | 237 (8.8)                        |
| 5 - more than 3500                | 0 (NA)                      | 3 (2.6)                      | 12 (4.4)                     | 0 (NA)                       | 581 (25)                     | 596 (22)                         |
| Missing                           | 112                         | 65                           | 154                          | 158                          | 1,260                        | 1,749                            |
| Body mass index                   |                             |                              |                              |                              |                              |                                  |
|                                   | NA                          | NA                           | NA                           | NA                           | 26 (23, 29)                  | 26 (23, 29)                      |
| Missing                           | 112                         | 180                          | 426                          | 158                          | 1,064                        | 1,940                            |
| Marital status, n (%)             |                             |                              |                              |                              |                              |                                  |
| 1 - Single                        | 0 (NA)                      | 23 (16)                      | 32 (9.8)                     | 51 (32)                      | 331 (12)                     | 437 (13)                         |
| 2 - Married/Living with a partner | 0 (NA)                      | 90 (62)                      | 214 (65)                     | 107 (68)                     | 1,830 (69)                   | 2,241 (68)                       |
| 3 - Divorced/Separated            | 0 (NA)                      | 23 (16)                      | 58 (18)                      | 0 (0)                        | 327 (12)                     | 408 (12)                         |
| 4 - Widowed                       | 0 (NA)                      | 9 (6.2)                      | 23 (7.0)                     | 0 (0)                        | 177 (6.6)                    | 209 (6.3)                        |
| Missing                           | 112                         | 35                           | 99                           | 0                            | 907                          | 1,153                            |
| Smoker status at diagnosis, n (%) |                             |                              |                              |                              |                              |                                  |
| 1 - Current                       | 38 (34)                     | 34 (24)                      | 74 (34)                      | 0 (NA)                       | 500 (20)                     | 646 (21)                         |
| 2 - Former                        | 39 (35)                     | 100 (69)                     | 121 (55)                     | 0 (NA)                       | 1,487 (58)                   | 1,747 (57)                       |
| 3 - Never                         | 35 (31)                     | 10 (6.9)                     | 24 (11)                      | 0 (NA)                       | 577 (23)                     | 646 (21)                         |
| Missing                           | 0                           | 36                           | 207                          | 158                          | 1,008                        | 1,409                            |
| Units of alcohol per month        |                             |                              |                              |                              |                              |                                  |
|                                   | 193 (129, 451)              | 47 (0, 159)                  | 53 (5, 160)                  | NA                           | 88 (36, 172)                 | 84 (28, 172)                     |
| Missing                           | 80                          | 40                           | 209                          | 158                          | 1,558                        | 2,045                            |

| Characteristic                         | INT<br>N = 112 <sup>1</sup> | UMM1<br>N = 180 <sup>1</sup> | UMM2<br>N = 426 <sup>1</sup> | UMM3<br>N = 158 <sup>1</sup> | UOB<br>N = 3572 <sup>1</sup> | Overall<br>N = 4448 <sup>1</sup> |
|----------------------------------------|-----------------------------|------------------------------|------------------------------|------------------------------|------------------------------|----------------------------------|
| Tumour location, n (%)                 |                             |                              |                              |                              |                              |                                  |
| 1 - Oral cavity                        | 25 (22)                     | 0 (0)                        | 0 (0)                        | 83 (53)                      | 971 (27)                     | 1,079 (24)                       |
| 2 - Oropharynx                         | 66 (59)                     | 0 (0)                        | 2 (0.5)                      | 0 (0)                        | 1,509 (42)                   | 1,577 (35)                       |
| 3 - Nasopharynx                        | 0 (0)                       | 0 (0)                        | 0 (0)                        | 0 (0)                        | 69 (1.9)                     | 69 (1.6)                         |
| 4 - Hypopharynx                        | 6 (5.4)                     | 25 (14)                      | 16 (3.8)                     | 21 (13)                      | 135 (3.8)                    | 203 (4.6)                        |
| 5 - Larynx                             | 15 (13)                     | 140 (78)                     | 390 (92)                     | 49 (31)                      | 844 (24)                     | 1,438 (32)                       |
| 6 - Nasal cavity and paranasal sinuses | 0 (0)                       | 0 (0)                        | 0 (0)                        | 5 (3.2)                      | 44 (1.2)                     | 49 (1.1)                         |
| 7 - Overlapping several areas          | 0 (0)                       | 15 (8.3)                     | 18 (4.2)                     | 0 (0)                        | 0 (0)                        | 33 (0.7)                         |
| UICC 7th Ed., n (%)                    |                             |                              |                              |                              |                              |                                  |
| 1 - I                                  | 0 (0)                       | 5 (3.0)                      | 211 (53)                     | 34 (26)                      | 851 (24)                     | 1,101 (25)                       |
| 2 - II                                 | 0 (0)                       | 20 (12)                      | 97 (24)                      | 23 (18)                      | 661 (19)                     | 801 (18)                         |
| 3 - III                                | 21 (19)                     | 45 (27)                      | 32 (8.1)                     | 20 (15)                      | 497 (14)                     | 615 (14)                         |
| 4 - IV                                 | 91 (81)                     | 97 (58)                      | 57 (14)                      | 53 (41)                      | 1,554 (44)                   | 1,852 (42)                       |
| Missing                                | 0                           | 13                           | 29                           | 28                           | 9                            | 79                               |
| Surgery, n (%)                         |                             |                              |                              |                              |                              |                                  |
| 1 - Yes                                | 39 (35)                     | 168 (94)                     | 171 (40)                     | 82 (55)                      | 1,430 (40)                   | 1,890 (43)                       |
| 2 - No                                 | 73 (65)                     | 10 (5.6)                     | 254 (60)                     | 66 (45)                      | 2,142 (60)                   | 2,545 (57)                       |
| Missing                                | 0                           | 2                            | 1                            | 10                           | 0                            | 13                               |
| Radiotherapy, n (%)                    |                             |                              |                              |                              |                              |                                  |
| 1 - Yes                                | 112 (100)                   | 115 (80)                     | 76 (32)                      | 99 (63)                      | 2,742 (77)                   | 3,144 (75)                       |
| 2 - No                                 | 0 (0)                       | 29 (20)                      | 163 (68)                     | 59 (37)                      | 822 (23)                     | 1,073 (25)                       |
| Missing                                | 0                           | 36                           | 187                          | 0                            | 8                            | 231                              |
| Chemotherapy, n (%)                    |                             |                              |                              |                              |                              |                                  |
| 1 - Yes                                | 89 (79)                     | 15 (20)                      | 29 (11)                      | 43 (27)                      | 1,520 (43)                   | 1,696 (41)                       |
| 2 - No                                 | 23 (21)                     | 61 (80)                      | 228 (89)                     | 114 (73)                     | 2,042 (57)                   | 2,468 (59)                       |
| Missing                                | 0                           | 104                          | 169                          | 1                            | 10                           | 284                              |
| Country, n (%)                         |                             |                              |                              |                              |                              |                                  |
| Brazil                                 | 0 (0)                       | 0 (0)                        | 0 (0)                        | 10 (6.3)                     | 0 (0)                        | 10 (0.2)                         |
| Egypt                                  | 0 (0)                       | 0 (0)                        | 0 (0)                        | 4 (2.5)                      | 0 (0)                        | 4 (<0.1)                         |
| Germany                                | 0 (0)                       | 180 (100)                    | 426 (100)                    | 14 (8.9)                     | 0 (0)                        | 620 (14)                         |
| Israel                                 | 0 (0)                       | 0 (0)                        | 0 (0)                        | 6 (3.8)                      | 0 (0)                        | 6 (0.1)                          |
| Italy                                  | 112 (100)                   | 0 (0)                        | 0 (0)                        | 12 (7.6)                     | 0 (0)                        | 124 (2.8)                        |
| Japan                                  | 0 (0)                       | 0 (0)                        | 0 (0)                        | 1 (0.6)                      | 0 (0)                        | 1 (<0.1)                         |

| Characteristic | INT<br>N = 112 <sup>1</sup> | UMM1<br>N = 180 <sup>1</sup> | UMM2<br>N = 426 <sup>1</sup> | UMM3<br>N = 158 <sup>1</sup> | UOB<br>N = 3572 <sup>1</sup> | Overall<br>N = 4448 <sup>1</sup> |
|----------------|-----------------------------|------------------------------|------------------------------|------------------------------|------------------------------|----------------------------------|
| Norway         | 0 (0)                       | 0 (0)                        | 0 (0)                        | 22 (14)                      | 0 (0)                        | 22 (0.5)                         |
| Poland         | 0 (0)                       | 0 (0)                        | 0 (0)                        | 10 (6.3)                     | 0 (0)                        | 10 (0.2)                         |
| Portugal       | 0 (0)                       | 0 (0)                        | 0 (0)                        | 9 (5.7)                      | 0 (0)                        | 9 (0.2)                          |
| Spain          | 0 (0)                       | 0 (0)                        | 0 (0)                        | 7 (4.4)                      | 0 (0)                        | 7 (0.2)                          |
| Sweden         | 0 (0)                       | 0 (0)                        | 0 (0)                        | 35 (22)                      | 0 (0)                        | 35 (0.8)                         |
| UK             | 0 (0)                       | 0 (0)                        | 0 (0)                        | 21 (13)                      | 3,572 (100)                  | 3,593 (81)                       |
| USA            | 0 (0)                       | 0 (0)                        | 0 (0)                        | 7 (4.4)                      | 0 (0)                        | 7 (0.2)                          |

<sup>1</sup>n (%); Median (IQR)

435

436 **Table 4 – EORTC QLQ-C30 questionnaire scales stratified by study.**

437

| Characteristic        | INT<br>N = 112 <sup>1</sup> | UMM1<br>N = 180 <sup>1</sup> | UMM2<br>N = 426 <sup>1</sup> | UMM3<br>N = 158 <sup>1</sup> | UOB<br>N = 3572 <sup>1</sup> | Overall<br>N = 4448 <sup>1</sup> |
|-----------------------|-----------------------------|------------------------------|------------------------------|------------------------------|------------------------------|----------------------------------|
| Physical Functioning  | 93 (86, 100)                | 80 (53, 86)                  | 80 (66, 93)                  | 80 (60, 93)                  | 86 (66, 100)                 | 86 (66, 100)                     |
| Missing               | 57                          | 70                           | 194                          | 25                           | 1,485                        | 1,831                            |
| Role Functioning      | 100 (92, 100)               | 66 (33, 100)                 | 66 (50, 100)                 | 66 (33, 100)                 | 83 (66, 100)                 | 83 (66, 100)                     |
| Missing               | 57                          | 71                           | 195                          | 25                           | 1,471                        | 1,819                            |
| Cognitive Functioning | 100 (83, 100)               | 100 (66, 100)                | 100 (66, 100)                | 100 (83, 100)                | 83 (66, 100)                 | 83 (66, 100)                     |
| Missing               | 57                          | 70                           | 194                          | 29                           | 1,448                        | 1,798                            |
| Emotional Functioning | 91 (75, 100)                | 75 (50, 91)                  | 75 (50, 91)                  | 75 (58, 91)                  | 83 (66, 100)                 | 83 (66, 100)                     |
| Missing               | 57                          | 70                           | 194                          | 29                           | 1,464                        | 1,814                            |
| Social Functioning    | 100 (100, 100)              | 66 (50, 100)                 | 83 (50, 100)                 | 83 (50, 100)                 | 83 (66, 100)                 | 83 (66, 100)                     |
| Missing               | 57                          | 70                           | 194                          | 28                           | 1,457                        | 1,806                            |
| Fatigue               | 11 (0, 33)                  | 33 (11, 55)                  | 33 (11, 55)                  | 33 (22, 55)                  | 33 (11, 44)                  | 33 (11, 44)                      |
| Missing               | 57                          | 70                           | 195                          | 25                           | 1,454                        | 1,801                            |
| Pain                  | 0 (0, 16)                   | 33 (0, 50)                   | 16 (0, 37)                   | 33 (0, 50)                   | 16 (0, 33)                   | 16 (0, 33)                       |
| Missing               | 57                          | 70                           | 194                          | 26                           | 1,461                        | 1,808                            |
| Nausea/Vomiting       | 0 (0, 0)                    | 0 (0, 0)                     | 0 (0, 0)                     | 0 (0, 16)                    | 0 (0, 0)                     | 0 (0, 0)                         |
| Missing               | 57                          | 70                           | 195                          | 25                           | 1,449                        | 1,796                            |
| Diarrhoea             | 0 (0, 0)                    | 0 (0, 0)                     | 0 (0, 0)                     | 0 (0, 0)                     | 0 (0, 0)                     | 0 (0, 0)                         |
| Missing               | 57                          | 71                           | 194                          | 29                           | 1,443                        | 1,794                            |
| Constipation          | NA (NA, NA)                 | 0 (0, 0)                     | 0 (0, 0)                     | 0 (0, 33)                    | 0 (0, 33)                    | 0 (0, 33)                        |
| Missing               | 112                         | 70                           | 194                          | 30                           | 1,442                        | 1,848                            |

| <b>Characteristic</b> | <b>INT</b><br>N = 112 <sup>1</sup> | <b>UMM1</b><br>N = 180 <sup>1</sup> | <b>UMM2</b><br>N = 426 <sup>1</sup> | <b>UMM3</b><br>N = 158 <sup>1</sup> | <b>UOB</b><br>N = 3572 <sup>1</sup> | <b>Overall</b><br>N = 4448 <sup>1</sup> |
|-----------------------|------------------------------------|-------------------------------------|-------------------------------------|-------------------------------------|-------------------------------------|-----------------------------------------|
| Appetite Loss         | NA (NA, NA)                        | 0 (0, 33)                           | 0 (0, 33)                           | 33 (0, 66)                          | 0 (0, 33)                           | 0 (0, 33)                               |
| Missing               | 112                                | 70                                  | 196                                 | 25                                  | 1,456                               | 1,859                                   |
| Insomnia              | NA (NA, NA)                        | 0 (0, 66)                           | 33 (0, 66)                          | 33 (0, 66)                          | 33 (0, 33)                          | 33 (0, 33)                              |
| Missing               | 112                                | 70                                  | 195                                 | 26                                  | 1,442                               | 1,845                                   |
| Dyspnoea              | 0 (0, 33)                          | 33 (0, 66)                          | 33 (0, 33)                          | 0 (0, 33)                           | 0 (0, 33)                           | 0 (0, 33)                               |
| Missing               | 57                                 | 70                                  | 195                                 | 25                                  | 1,447                               | 1,794                                   |
| Financial Impact      | 0 (0, 0)                           | 33 (0, 66)                          | 33 (0, 66)                          | 0 (0, 33)                           | 0 (0, 33)                           | 0 (0, 33)                               |
| Missing               | 57                                 | 70                                  | 196                                 | 29                                  | 1,447                               | 1,799                                   |
| GHS/QoL               | 83 (75, 87)                        | 50 (41, 75)                         | 50 (33, 66)                         | 58 (50, 75)                         | 75 (58, 83)                         | 66 (50, 83)                             |
| Missing               | 57                                 | 65                                  | 179                                 | 29                                  | 1,444                               | 1,774                                   |
| GHS/QoL               | 83 (75, 87)                        | 50 (41, 75)                         | 50 (33, 66)                         | 58 (50, 75)                         | 75 (58, 83)                         | 66 (50, 83)                             |
| Missing               | 57                                 | 65                                  | 179                                 | 29                                  | 1,444                               | 1,774                                   |

<sup>1</sup>Median (IQR)

438

439

440 **Table 5 – EORTC QLQ-H&N35 module scales stratified by study.**

| <b>Characteristic</b>       | <b>INT</b><br>N = 112 <sup>1</sup> | <b>UMM1</b><br>N = 180 <sup>1</sup> | <b>UMM2</b><br>N = 426 <sup>1</sup> | <b>UMM3</b><br>N = 158 <sup>1</sup> | <b>UOB</b><br>N = 3572 <sup>1</sup> | <b>Overall</b><br>N = 4448 <sup>1</sup> |
|-----------------------------|------------------------------------|-------------------------------------|-------------------------------------|-------------------------------------|-------------------------------------|-----------------------------------------|
| Pain                        | 8 (0, 25)                          | 16 (0, 50)                          | 16 (0, 41)                          | 16 (8, 35)                          | 8 (0, 25)                           | 16 (0, 33)                              |
| Missing                     | 60                                 | 61                                  | 181                                 | 26                                  | 1,502                               | 1,830                                   |
| Swallowing Problems         | 8 (0, 16)                          | 16 (0, 41)                          | 8 (0, 46)                           | 0 (0, 33)                           | 8 (0, 25)                           | 8 (0, 25)                               |
| Missing                     | 60                                 | 63                                  | 183                                 | 30                                  | 1,484                               | 1,820                                   |
| Senses Problems             | 16 (0, 33)                         | 66 (50, 100)                        | 0 (0, 16)                           | 33 (0, 54)                          | 16 (0, 50)                          | 16 (0, 50)                              |
| Missing                     | 60                                 | 61                                  | 178                                 | 26                                  | 1,453                               | 1,778                                   |
| Speech Problems             | 11 (0, 22)                         | 66 (36, 77)                         | 55 (33, 88)                         | 26 (13, 46)                         | 11 (0, 33)                          | 22 (0, 44)                              |
| Missing                     | 60                                 | 66                                  | 179                                 | 31                                  | 1,479                               | 1,815                                   |
| Trouble with social eating  | 8 (0, 16)                          | 25 (6, 50)                          | 0 (0, 25)                           | 25 (4, 50)                          | 16 (0, 41)                          | 16 (0, 41)                              |
| Missing                     | 60                                 | 64                                  | 183                                 | 31                                  | 1,491                               | 1,829                                   |
| Trouble with social contact | 0 (0, 6)                           | 13 (0, 40)                          | 6 (0, 20)                           | 0 (0, 33)                           | 0 (0, 13)                           | 0 (0, 20)                               |
| Missing                     | 60                                 | 60                                  | 179                                 | 33                                  | 1,486                               | 1,818                                   |
| Less Sexuality              | 0 (0, 33)                          | 33 (0, 66)                          | 33 (0, 66)                          | 16 (0, 66)                          | 33 (0, 66)                          | 33 (0, 66)                              |
| Missing                     | 60                                 | 73                                  | 196                                 | 39                                  | 1,696                               | 2,064                                   |
| Teeth Problems              | 0 (0, 33)                          | 0 (0, 33)                           | 0 (0, 0)                            | 22 (0, 44)                          | 0 (0, 33)                           | 0 (0, 33)                               |
| Missing                     | 60                                 | 63                                  | 178                                 | 27                                  | 1,486                               | 1,814                                   |
| Opening Mouth               | 0 (0, 33)                          | 0 (0, 66)                           | 0 (0, 0)                            | 0 (0, 33)                           | 0 (0, 33)                           | 0 (0, 33)                               |
| Missing                     | 60                                 | 61                                  | 179                                 | 27                                  | 1,447                               | 1,774                                   |
| Dry Mouth                   | 33 (33, 66)                        | 33 (0, 66)                          | 100 (0, 100)                        | 33 (16, 66)                         | 33 (33, 92)                         | 33 (33, 100)                            |
| Missing                     | 60                                 | 62                                  | 179                                 | 26                                  | 1,446                               | 1,773                                   |
| Sticky Saliva               | 33 (33, 66)                        | 33 (0, 66)                          | 100 (0, 200)                        | 2 (1, 3)                            | 33 (0, 66)                          | 33 (0, 66)                              |
| Missing                     | 60                                 | 62                                  | 180                                 | 27                                  | 1,458                               | 1,787                                   |
| Coughing                    | 0 (0, 33)                          | 66 (33, 74)                         | 100 (100, 200)                      | 0 (0, 33)                           | 33 (0, 33)                          | 33 (0, 66)                              |
| Missing                     | 60                                 | 60                                  | 180                                 | 26                                  | 1,449                               | 1,775                                   |
| Felt Ill                    | 0 (0, 0)                           | 33 (0, 66)                          | 100 (0, 200)                        | NA (NA, NA)                         | 0 (0, 33)                           | 0 (0, 33)                               |
| Missing                     | 60                                 | 61                                  | 180                                 | 158                                 | 1,453                               | 1,912                                   |
| Pain Killers                | 33 (25, 33)                        | 0 (0, 100)                          | 0 (0, 100)                          | NA (NA, NA)                         | 0 (0, 100)                          | 0 (0, 100)                              |
| Missing                     | 60                                 | 58                                  | 178                                 | 158                                 | 1,449                               | 1,903                                   |
| Nutritional Supplements     | 33 (33, 33)                        | 0 (0, 0)                            | 0 (0, 0)                            | NA (NA, NA)                         | 0 (0, 100)                          | 0 (0, 100)                              |
| Missing                     | 60                                 | 59                                  | 180                                 | 158                                 | 1,454                               | 1,911                                   |
| Feeding Tube                | 33 (33, 33)                        | 0 (0, 100)                          | 0 (0, 0)                            | NA (NA, NA)                         | 0 (0, 0)                            | 0 (0, 0)                                |
| Missing                     | 60                                 | 58                                  | 180                                 | 158                                 | 1,458                               | 1,914                                   |

| Characteristic | INT<br>N = 112 <sup>1</sup> | UMM1<br>N = 180 <sup>1</sup> | UMM2<br>N = 426 <sup>1</sup> | UMM3<br>N = 158 <sup>1</sup> | UOB<br>N = 3572 <sup>1</sup> | Overall<br>N = 4448 <sup>1</sup> |
|----------------|-----------------------------|------------------------------|------------------------------|------------------------------|------------------------------|----------------------------------|
| Weight Loss    | 33 (33, 33)                 | 0 (0, 100)                   | 0 (0, 100)                   | 0 (0, 33)                    | 0 (0, 0)                     | 0 (0, 0)                         |
| Missing        | 60                          | 60                           | 180                          | 29                           | 1,473                        | 1,802                            |
| Weight Gain    | 33 (33, 33)                 | 0 (0, 100)                   | 0 (0, 0)                     | NA (NA, NA)                  | 0 (0, 100)                   | 0 (0, 100)                       |
| Missing        | 60                          | 59                           | 181                          | 158                          | 1,508                        | 1,966                            |

<sup>1</sup>Median (IQR)

441

442 **Table 6 - Odds ratios (OR) and p-values from univariate logistic regression models with**  
 443 **response “Missing GHS/QoL” given the respective covariate in the table.**

|                                             | OR   | p-value |
|---------------------------------------------|------|---------|
| <b>Sex</b>                                  |      |         |
| Male                                        | —    | —       |
| Female                                      | 0.88 | <.001   |
| <b>Age</b>                                  |      |         |
|                                             | 0.99 | <.001   |
| <b>Education level</b>                      |      |         |
| Low                                         | —    | —       |
| Medium                                      | 0.81 | 0.02    |
| High                                        | 0.51 | <.001   |
| <b>Income</b>                               |      |         |
| Less than 500                               | —    | —       |
| 500 - 1500                                  | 0.74 | 0.02    |
| 1501 - 2500                                 | 0.64 | 0.001   |
| 2501 - 3500                                 | 0.65 | 0.02    |
| More than 3500                              | 0.50 | <.001   |
| <b>Body mass index</b>                      |      |         |
|                                             | 0.99 | 0.05    |
| <b>Marital status</b>                       |      |         |
| Single                                      | —    | —       |
| Married/Living with a partner               | 0.74 | 0.01    |
| Divorced/Separated                          | 1.07 | 0.62    |
| Widowed                                     | 0.82 | 0.28    |
| <b>Smoker status at the baseline</b>        |      |         |
| Current                                     | —    | —       |
| Former                                      | 0.55 | <.001   |
| Never                                       | 0.48 | <.001   |
| <b>Units of alcohol per month</b>           |      |         |
|                                             | 1.00 | 0.002   |
| <b>Tumour stage (TNM 7<sup>th</sup> Ed)</b> |      |         |
| I                                           | —    | —       |
| II                                          | 1.20 | 0.04    |
| III                                         | 1.00 | 0.89    |
| IV                                          | 1.11 | 0.15    |
| <b>Tumour region</b>                        |      |         |
| Oral cavity                                 | —    | —       |
| Oropharynx                                  | 0.94 | 0.47    |



---

|                                           |      |       |
|-------------------------------------------|------|-------|
| <b>Nasopharynx</b>                        | 0.87 | 0.58  |
| <b>Hypopharynx</b>                        | 1.10 | 0.28  |
| <b>Larynx</b>                             | 1.09 | 0.28  |
| <b>Overlapping several areas</b>          | 1.27 | 0.50  |
| <b>Nasal cavity and paranasal sinuses</b> | 1.05 | 0.86  |
| <b>Radiotherapy</b>                       |      |       |
| <b>Yes</b>                                | —    |       |
| <b>No</b>                                 | 0.80 | 0.002 |
| <b>Chemotherapy</b>                       |      |       |
| <b>Yes</b>                                | —    | —     |
| <b>No</b>                                 | 0.94 | 0.31  |
| <b>Surgery</b>                            |      |       |
| <b>Yes</b>                                | —    | —     |
| <b>No</b>                                 | 0.99 | 0.83  |

---

444

445

446

447

448

449

450

451

452

453

454

455

456

457

458

459

460

461

462

463

## Figures

464

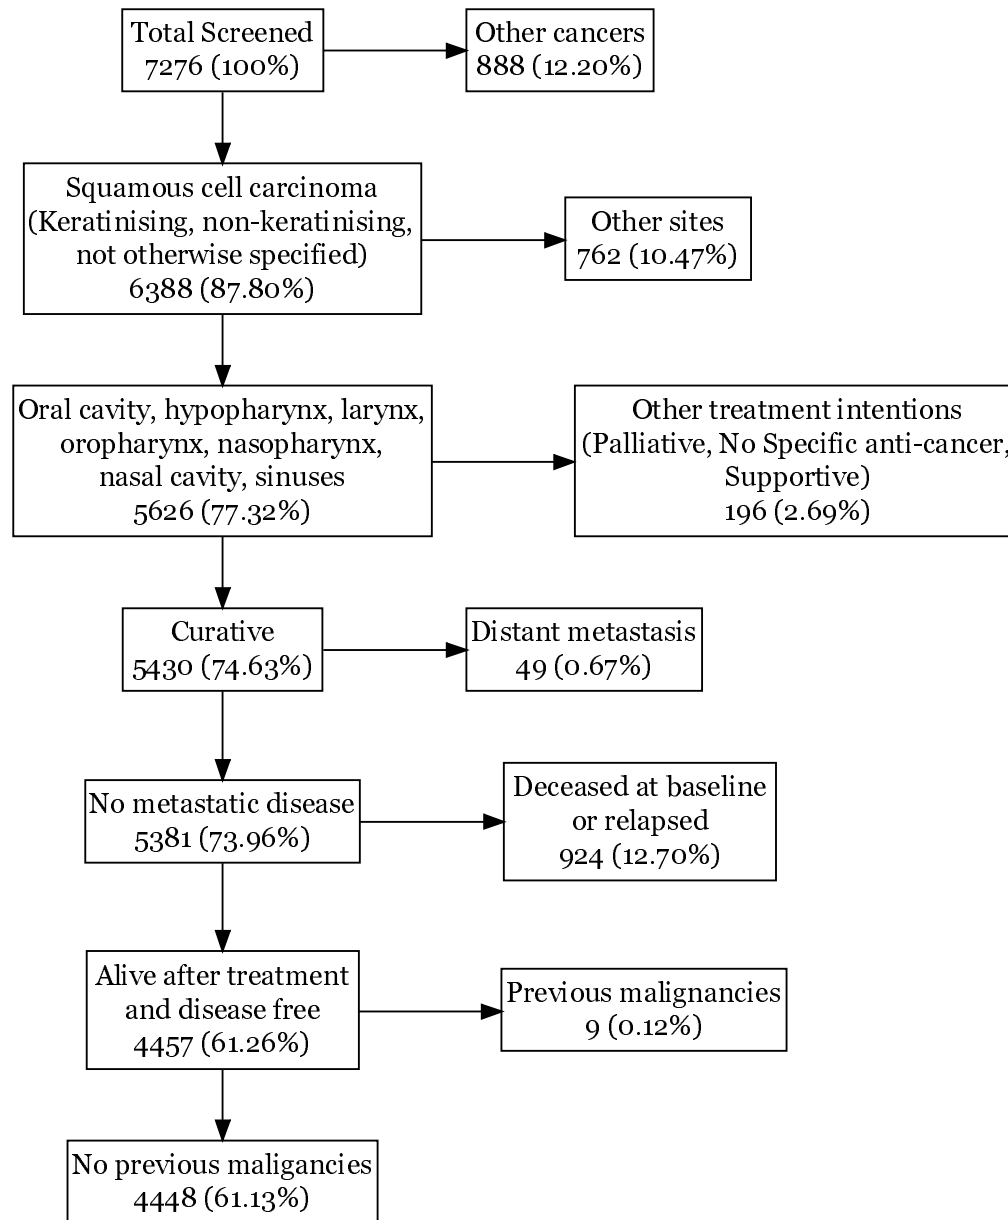

465

466 **Figure 1** – Cohort flowchart for the entire BD4QoL cohort. See Supplementary Information for  
467 flowcharts for each study.

468

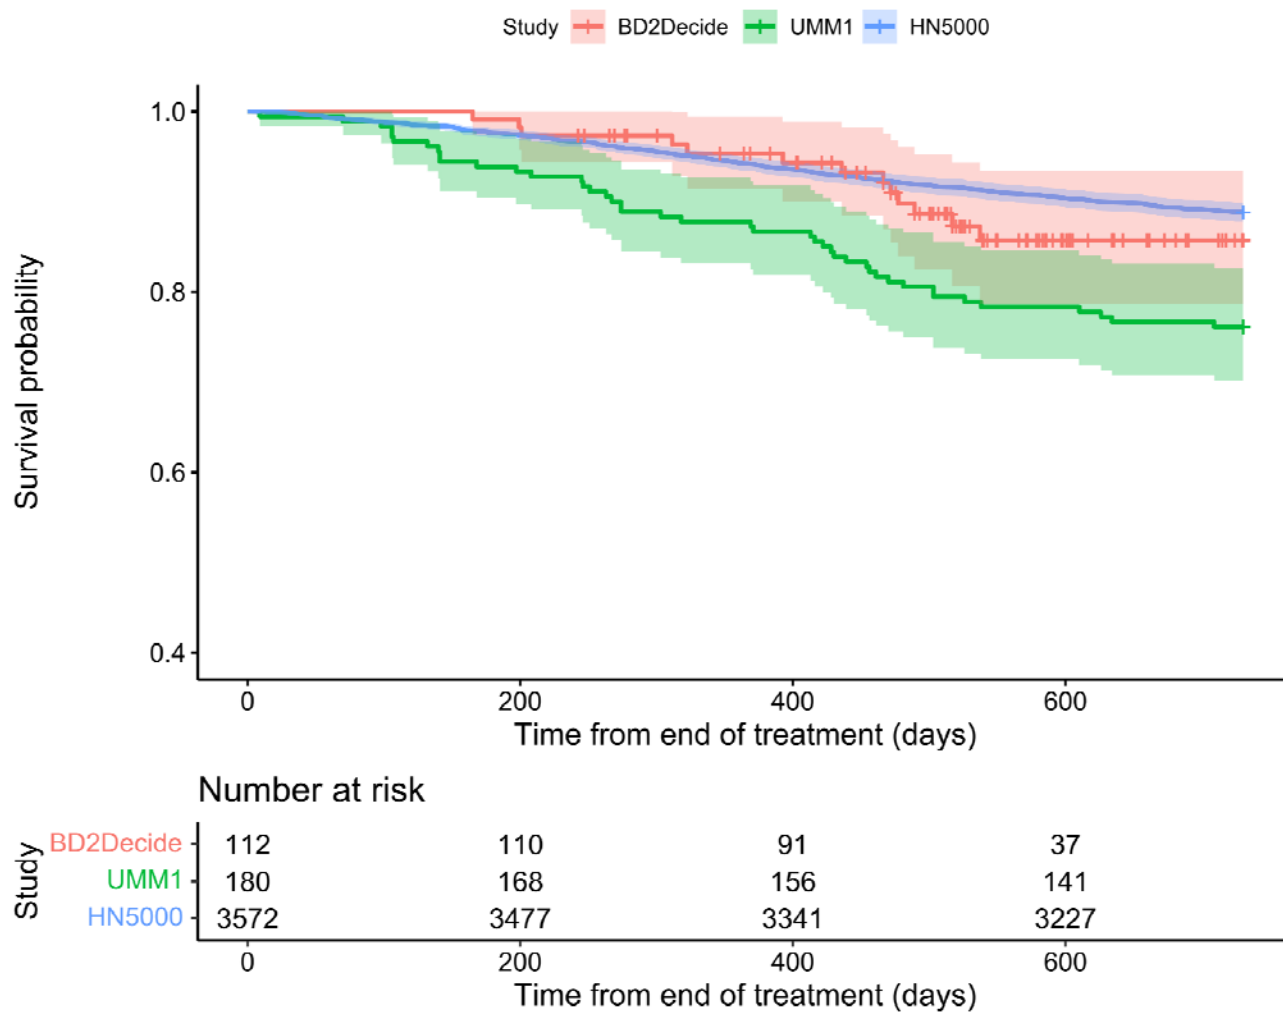

469

470 **Figure 2** – Kaplan-Meier curves with 95% confidence interval for BD2Decide, UMM1 and HN5000  
 471 studies showing 2 years overall survival after treatment. Other studies did not have the necessary  
 472 time to event data for inclusion in the curve.

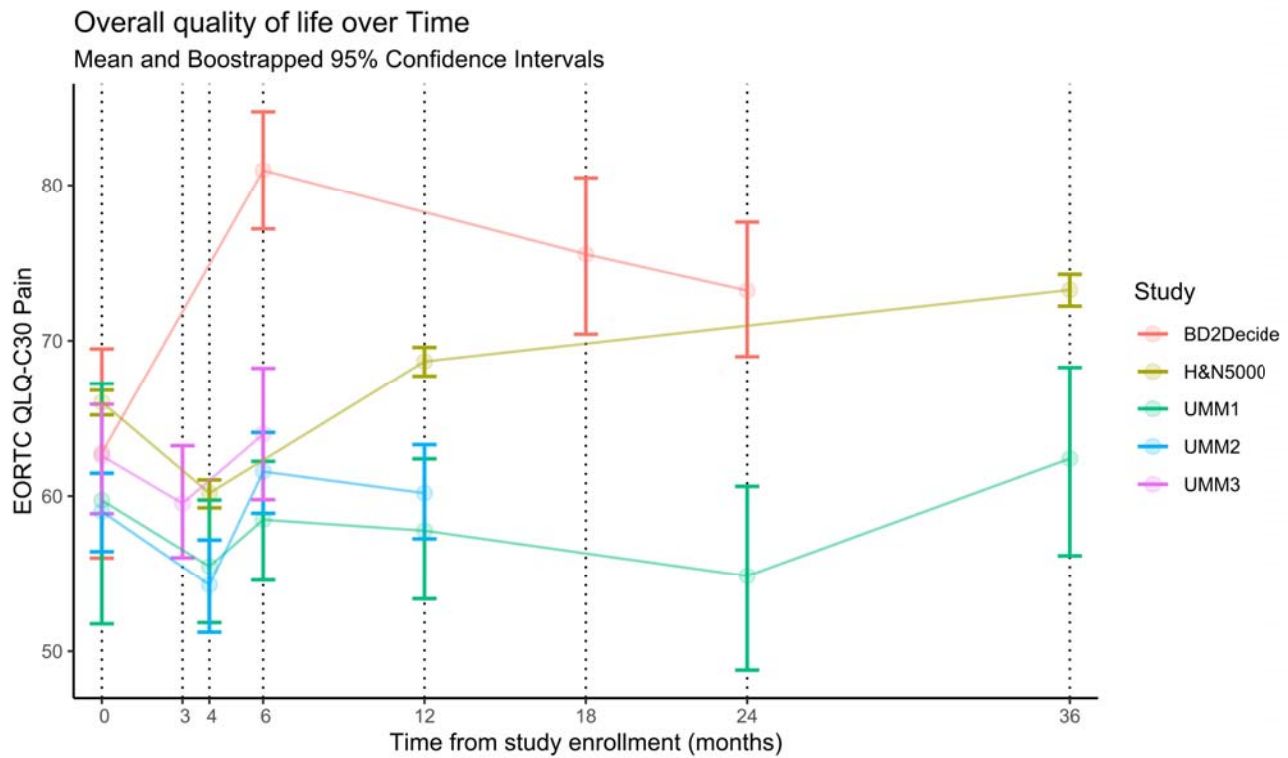

473

474 **Figure 3 – Global QoL trajectories conditional on survival and measured QoL per study. The**  
475 **baseline for UMM1 and UMM2 is at 4 months, UMM3 is at 3 months, BD2Decide is at 6**  
476 **months, and HN5000 at 12 months. Measurements at time 0 are before treatment and all**  
477 **measurements before the respective baselines are for patients that survived treatment and**  
478 **completed the questionnaires. Patients with missing global QoL were not considered in this**  
479 **figure.**

480

481

## 482 12 References

- 483 1. Mody MD, Rocco JW, Yom SS, Haddad RI, Saba NF. Head and neck cancer. *The Lancet*.  
484 2021;398(10318):2289-2299. doi:10.1016/S0140-6736(21)01550-6
- 485 2. Vos T, Abajobir AA, Abate KH, et al. Global, regional, and national incidence, prevalence, and  
486 years lived with disability for 328 diseases and injuries for 195 countries, 1990–2016: a  
487 systematic analysis for the Global Burden of Disease Study 2016. *The Lancet*.  
488 2017;390(10100):1211-1259. doi:10.1016/S0140-6736(17)32154-2
- 489 3. Mehanna H, Paleri V, West CML, Nutting C. Head and neck cancer--Part 1: Epidemiology,  
490 presentation, and prevention. *BMJ*. 2010;341(sep20 1):c4684-c4684. doi:10.1136/bmj.c4684
- 491 4. Ferlay J, Colombet M, Soerjomataram I, et al. Cancer statistics for the year 2020: An overview. *Int*  
492 *J Cancer*. 2021;149(4):778-789. doi:10.1002/ijc.33588
- 493 5. Pulte D, Brenner H. Changes in Survival in Head and Neck Cancers in the Late 20th and Early  
494 21st Century: A Period Analysis. *The Oncologist*. 2010;15(9):994-1001.  
495 doi:10.1634/theoncologist.2009-0289
- 496 6. Høxbroe Michaelsen S, Grønhøj C, Høxbroe Michaelsen J, Friberg J, von Buchwald C. Quality of  
497 life in survivors of oropharyngeal cancer: A systematic review and meta-analysis of 1366  
498 patients. *European Journal of Cancer*. 2017;78:91-102. doi:10.1016/j.ejca.2017.03.006
- 499 7. Ramqvist T, Dalianis T. Oropharyngeal Cancer Epidemic and Human Papillomavirus. *Emerg*  
500 *Infect Dis*. 2010;16(11):1671-1677. doi:10.3201/eid1611.100452
- 501 8. Carlander ALF, Grønhøj Larsen C, Jensen DH, et al. Continuing rise in oropharyngeal cancer in a  
502 high HPV prevalence area: A Danish population-based study from 2011 to 2014. *European*  
503 *Journal of Cancer*. 2017;70:75-82. doi:10.1016/j.ejca.2016.10.015
- 504 9. Ang KK, Harris J, Wheeler R, et al. Human Papillomavirus and Survival of Patients with  
505 Oropharyngeal Cancer. *N Engl J Med*. 2010;363(1):24-35. doi:10.1056/NEJMoa0912217
- 506 10. Patel MA, Blackford AL, Rettig EM, Richmon JD, Eisele DW, Fakhry C. Rising population of  
507 survivors of oral squamous cell cancer in the United States: Rising Oral Cancer Survivors in the  
508 US. *Cancer*. 2016;122(9):1380-1387. doi:10.1002/cncr.29921
- 509 11. Goyal N, Day A, Epstein J, et al. Head and neck cancer survivorship consensus statement from  
510 the American Head and Neck Society. *Laryngoscope Investig Oto*. 2022;7(1):70-92.  
511 doi:10.1002/lio2.702
- 512 12. Forastiere A, Koch W, Trotti A, Sidransky D. Head and Neck Cancer. *N Engl J Med*.  
513 2001;345(26):1890-1900. doi:10.1056/NEJMra001375
- 514 13. Vermorken JB, Specenier P. Optimal treatment for recurrent/metastatic head and neck cancer.  
515 *Annals of Oncology*. 2010;21:vii252-vii261. doi:10.1093/annonc/mdq453

- 516 14. Strojjan P, Hutcheson KA, Eisbruch A, et al. Treatment of late sequelae after radiotherapy for  
517 head and neck cancer. *Cancer Treatment Reviews*. 2017;59:79-92.  
518 doi:10.1016/j.ctrv.2017.07.003
- 519 15. Alterio D, Jereczek-Fossa BA, Franchi B, et al. Thyroid disorders in patients treated with  
520 radiotherapy for head-and-neck cancer: A retrospective analysis of seventy-three patients.  
521 *International Journal of Radiation Oncology\*Biological\*Physics*. 2007;67(1):144-150.  
522 doi:10.1016/j.ijrobp.2006.08.051
- 523 16. Taylor K, Krüger M, Singer S. Long-term toxicity among head and neck cancer patients—A  
524 systematic review. *Onkologie*. 2021;27(S2):145-149. doi:10.1007/s00761-021-00914-x
- 525 17. Quinten C, Martinelli F, Coens C, et al. A global analysis of multitrail data investigating quality  
526 of life and symptoms as prognostic factors for survival in different tumor sites. *Cancer*.  
527 2014;120(2):302-311. doi:10.1002/cncr.28382
- 528 18. van Nieuwenhuizen AJ, Buffart LM, Brug J, René Leemans C, Verdonck-de Leeuw IM. The  
529 association between health related quality of life and survival in patients with head and neck  
530 cancer: A systematic review. *Oral Oncology*. 2015;51(1):1-11.  
531 doi:10.1016/j.oraloncology.2014.09.002
- 532 19. So W, Chan R, Chan D, et al. Quality-of-life among head and neck cancer survivors at one year  
533 after treatment—a systematic review. *European journal of cancer*. 2012;48(15):2391-2408.
- 534 20. Taylor KJ, Amdal CD, Bjordal K, et al. Serious Long-Term Effects of Head and Neck Cancer  
535 from the Survivors' Point of View. *Healthcare*. 2023;11(6):906.  
536 doi:10.3390/healthcare11060906
- 537 21. Alonso I, Lopez-Perez L, Guirado JCM, Cabrera-Umpierrez MF, Arredondo MT, Fico G. Data  
538 analytics for predicting quality of life changes in head and neck cancer survivors: a scoping  
539 review. In: *2021 43rd Annual International Conference of the IEEE Engineering in Medicine &*  
540 *Biology Society (EMBC)*. IEEE; 2021:2262-2265.
- 541 22. Taylor K, Singer S. Long-term quality of life in head and neck cancer patients: A systematic  
542 review. *Onkologie*. 2019;25(S2):125-131. doi:10.1007/s00761-019-0527-z
- 543 23. Aaronson NK, Ahmedzai S, Bergman B, et al. The European Organization for Research and  
544 Treatment of Cancer QLQ-C30: A Quality-of-Life Instrument for Use in International Clinical  
545 Trials in Oncology. *JNCI Journal of the National Cancer Institute*. 1993;85(5):365-376.  
546 doi:10.1093/jnci/85.5.365
- 547 24. Fayers P, Aaronson NK, Bjordal K, Sullivan M. *EORTC QLQ-C30 Scoring Manual*. European  
548 Organisation for Research and Treatment of Cancer; 1995.
- 549 25. The Head and Neck 5000 Study Team, Ness AR, Waylen A, et al. Establishing a large  
550 prospective clinical cohort in people with head and neck cancer as a biomedical resource: head  
551 and neck 5000. *BMC Cancer*. 2014;14(1):973. doi:10.1186/1471-2407-14-973



- 552 26. Ness AR, Waylen A, Hurley K, et al. Recruitment, response rates and characteristics of 5511  
553 people enrolled in a prospective clinical cohort study: head and neck 5000. *Clinical*  
554 *Otolaryngology*. 2016;41(6):804-809. doi:<https://doi.org/10.1111/coa.12548>
- 555 27. Singer S, Danker H, Guntinas-Lichius O, et al. Quality of life before and after total  
556 laryngectomy: Results of a multicenter prospective cohort study. *Head & Neck*. 2014;36(3):359-  
557 368. doi:10.1002/hed.23305
- 558 28. Clasen D, Keszte J, Dietz A, et al. Quality of life during the first year after partial laryngectomy:  
559 Longitudinal study. *Head & Neck*. 2018;40(6):1185-1195. doi:10.1002/hed.25095
- 560 29. Singer S, Amdal CD, Hammerlid E, et al. International validation of the revised European  
561 Organisation for Research and Treatment of Cancer Head and Neck Cancer Module, the EORTC  
562 QLQ-HN43: Phase IV. *Head & Neck*. 2019;41(6):1725-1737. doi:10.1002/hed.25609
- 563 30. Cavalieri S, De Cecco L, Brakenhoff RH, et al. Development of a multiomics database for  
564 personalized prognostic forecasting in head and neck cancer: The Big Data to Decide EU Project.  
565 *Head & neck*. 2021;43(2):601-612.
- 566 31. Compton SEC, Cancer AJC on, others. the 7th edition of the AJCC cancer staging manual and  
567 the future of TNM Ann. *Surg Oncol*. 17:1471-1474.
- 568 32. Almeida A, Bilbao-Jayo A, Hernandez L, et al. An Ontology for Quality of Life Modeling in  
569 Head and Neck Cancer. In: *2022 7th International Conference on Smart and Sustainable*  
570 *Technologies (SpliTech)*. IEEE; 2022:1-5. doi:10.23919/SpliTech55088.2022.9854379
- 571 33. Giesinger JM, Loth FLC, Aaronson NK, et al. Thresholds for clinical importance were  
572 established to improve interpretation of the EORTC QLQ-C30 in clinical practice and research.  
573 *Journal of Clinical Epidemiology*. 2020;118:1-8. doi:10.1016/j.jclinepi.2019.10.003
- 574 34. Lopez-Perez L, Hernández L, Ottaviano M, et al. BD2Decide: Big Data and Models for  
575 Personalized Head and Neck Cancer Decision Support. In: *2019 IEEE 32nd International*  
576 *Symposium on Computer-Based Medical Systems (CBMS)*. ; 2019:67-68.  
577 doi:10.1109/CBMS.2019.00024
- 578 35. Hernández L, Estévez-Priego E, López-Pérez L, et al. HeNeCO: An ontology for integrative  
579 research in Head and Neck cancer. *International Journal of Medical Informatics*.  
580 2024;181:105284. doi:10.1016/j.ijmedinf.2023.105284
- 581 36. Sandstrom, RN, MSN, APRN-BC, AOCN SK, R. Mazanec, PhD, RN, AOCN S, Gittleman, MS  
582 H, S. Barnholtz-Sloan, PhD J, Tamburro, LISW-S N, J. Daly, PhD, RN, FAAN B. A Descriptive,  
583 Longitudinal Study of Quality of Life and Perceived Health Needs in Patients With Head and  
584 Neck Cancer. *JADPRO*. 2016;7(6). doi:10.6004/jadpro.2016.7.6.6
- 585 37. de Vries J, Bras L, Sidorenkov G, et al. Frailty is associated with decline in health-related quality  
586 of life of patients treated for head and neck cancer. *Oral Oncology*. 2020;111:105020.  
587 doi:10.1016/j.oraloncology.2020.105020
- 588 38. Abel E, Silander E, Nordström F, et al. Fatigue in Patients With Head and Neck Cancer Treated  
589 With Radiation Therapy: A Prospective Study of Patient-Reported Outcomes and Their

- 590 Association With Radiation Dose to the Cerebellum. *Advances in Radiation Oncology*.  
591 2022;7(5):100960. doi:10.1016/j.adro.2022.100960
- 592 39. Braam PM, Roesink JM, Raaijmakers CP, Busschers WB, Terhaard CH. Quality of life and  
593 salivary output in patients with head-and-neck cancer five years after radiotherapy. *Radiat Oncol*.  
594 2007;2(1):3. doi:10.1186/1748-717X-2-3
- 595 40. Mitra R, McGough SF, Chakraborti T, et al. Learning from data with structured missingness. *Nat*  
596 *Mach Intell*. 2023;5(1):13-23. doi:10.1038/s42256-022-00596-z
- 597 41. Kamphuis R, Jolani S, Lugtig P. The Blocked Imputation Approach for Missing Data. Published  
598 online 2018. doi:10.13140/RG.2.2.12467.32803
- 599 42. Tierney NJ, Harden FA, Harden MJ, Mengersen KL. Using decision trees to understand structure  
600 in missing data. *BMJ Open*. 2015;5(6):e007450. doi:10.1136/bmjopen-2014-007450
- 601 43. J. Pater, D. Osoba, B. Zee, et al. Effects of Altering the Time of Administration and the Time  
602 Frame of Quality of life Assessments in Clinical Trials: An Example Using the EORTC QLQ-  
603 C30 in a Large Anti-Emetic Trial. *Quality of Life Research*. 1998;(7):273-278.  
604 doi:10.1023/A:1024954518241
- 605
